# Supplementary material for: Pyridine-based hypercrosslinked polymers as support materials for palladium photocatalysts and their application in Suzuki–Miyaura coupling reactions
Source: Royal Society of Chemistry journal article supplement (doi:10.1039/d0nj01675f), 2020-01-01
Supplement: d0nj01675f1.pdf [file d0nj01675f1.pdf]

## Supporting information

### Pyridine-Based Hypercrosslinked Polymers as Support for Palladium Photocatalysts and Their Application in Suzuki–Miyaura Coupling Reactions

Yan Zhang, Le Zhang, Xiaoli Zhang, Didi Yang, Cheng Du, Liu Wan, Chaktong Au, Jian Chen\*, Mingjiang Xie\*

*Hubei Key Laboratory for Processing and Application of Catalytic Materials, Huanggang Normal University, Huanggang 438000, China*

\*E-mail: [chenjian@hgnu.edu.cn](mailto:chenjian@hgnu.edu.cn); [xiemingjiang@smail.nju.edu.cn](mailto:xiemingjiang@smail.nju.edu.cn)

**Table S1.** Details for the synthesis of pyridine-based POFs materials<sup>a</sup>

| Entry | 2,2'-bipyridine | Co-monomers                   | AlCl <sub>3</sub> | Sample |
|-------|-----------------|-------------------------------|-------------------|--------|
| 1     | 0.817 g         | Tetraphenylmethane (0.641 g)  | 4.269             | P2     |
| 2     | 0.813 g         | Triptycene (0.678 g)          | 4.261             | P3     |
| 3     | 0.819 g         | Tetraphenylethylene (0.665 g) | 4.271             | P4     |
| 4     | 0.811 g         | Benzene (0.208 g)             | 4.265             | P5     |
| 5     | 0.812 g         | Anthracene (0.357 g)          | 4.270             | P6     |
| 6     | 0.817 g         | Pyrene (0.405 g)              | 4.267             | P7     |
| 7     | 0.816 g         | Perylene (0.505 g)            | 4.269             | P8     |

<sup>a</sup> Pyridine-based POFs materials were synthesized by employing the method of P1

**Table S2.** Textual properties of pyridine-based POFs materials

| Entry | Sample | S <sub>BET</sub> <sup>a</sup> (m <sup>2</sup> g <sup>-1</sup> ) | Pore Volume <sup>b</sup> (ml g <sup>-1</sup> ) |
|-------|--------|-----------------------------------------------------------------|------------------------------------------------|
| 1     | P1     | 846                                                             | 0.47                                           |
| 2     | P2     | 795                                                             | 0.98                                           |
| 3     | P3     | 1166                                                            | 0.57                                           |
| 4     | P4     | 1412                                                            | 0.75                                           |
| 5     | P5     | 1153                                                            | 0.58                                           |
| 6     | P6     | 1344                                                            | 0.79                                           |
| 7     | P7     | 988                                                             | 0.53                                           |
| 8     | P8     | 1227                                                            | 1.07                                           |

<sup>a</sup> Specific surface area calculated from nitrogen adsorption isotherms at 77.3 K using the BET equation. <sup>b</sup> Pore volume calculated from the nitrogen isotherms at P/P<sub>0</sub>=0.995 and 77.3 K.

**Table S3.** Optimization of reaction conditions for S–M reactions over Pd/P6 catalyst. [a]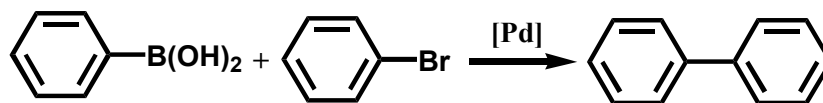

| Entry             | Base                                                | Solvent (2mL)                                                   | Yield (%) <sup>[b]</sup> |
|-------------------|-----------------------------------------------------|-----------------------------------------------------------------|--------------------------|
| 1                 | K <sub>3</sub> PO <sub>4</sub> ·3H <sub>2</sub> O   | V <sub>Methanol</sub> :V <sub>H<sub>2</sub>O</sub> =3:2         | 99.2                     |
| 2                 | K <sub>3</sub> PO <sub>4</sub> ·3H <sub>2</sub> O   | V <sub>DMF</sub> :V <sub>H<sub>2</sub>O</sub> =3:2              | 74.7                     |
| 3                 | K <sub>3</sub> PO <sub>4</sub> ·3H <sub>2</sub> O   | V <sub>DCM</sub> :V <sub>H<sub>2</sub>O</sub> =3:2              | 76.9                     |
| 4                 | K <sub>3</sub> PO <sub>4</sub> ·3H <sub>2</sub> O   | V <sub>1,4-dioxane</sub> :V <sub>H<sub>2</sub>O</sub> =3:2      | 87.7                     |
| 5                 | K <sub>3</sub> PO <sub>4</sub> ·3H <sub>2</sub> O   | V <sub>Acetonitrile</sub> :V <sub>H<sub>2</sub>O</sub> =3:2     | 75.0                     |
| 6                 | K <sub>3</sub> PO <sub>4</sub> ·3H <sub>2</sub> O   | V <sub>Ethylene acetate</sub> :V <sub>H<sub>2</sub>O</sub> =3:2 | 70.4                     |
| 7                 | K <sub>3</sub> PO <sub>4</sub> ·3H <sub>2</sub> O   | V <sub>CHCl<sub>3</sub></sub> :V <sub>H<sub>2</sub>O</sub> =3:2 | 73.7                     |
| 8                 | K <sub>3</sub> PO <sub>4</sub> ·3H <sub>2</sub> O   | V <sub>EtOH</sub> :V <sub>H<sub>2</sub>O</sub> =3:2             | 96.6                     |
| 9                 | KOH                                                 | V <sub>EtOH</sub> :V <sub>H<sub>2</sub>O</sub> =3:2             | 89.4                     |
| 10                | NaH <sub>2</sub> PO <sub>4</sub> ·2H <sub>2</sub> O | V <sub>EtOH</sub> :V <sub>H<sub>2</sub>O</sub> =3:2             | 78.7                     |
| 11                | CH <sub>3</sub> COONa                               | V <sub>EtOH</sub> :V <sub>H<sub>2</sub>O</sub> =3:2             | 90.0                     |
| 12                | CH <sub>3</sub> ONa                                 | V <sub>EtOH</sub> :V <sub>H<sub>2</sub>O</sub> =3:2             | 93.0                     |
| 13                | NaHCO <sub>3</sub>                                  | V <sub>EtOH</sub> :V <sub>H<sub>2</sub>O</sub> =3:2             | 63.7                     |
| 14                | K <sub>2</sub> CO <sub>3</sub>                      | V <sub>EtOH</sub> :V <sub>H<sub>2</sub>O</sub> =3:2             | 95.0                     |
| 15 <sup>[c]</sup> | K <sub>3</sub> PO <sub>4</sub> ·3H <sub>2</sub> O   | V <sub>EtOH</sub> :V <sub>H<sub>2</sub>O</sub> =3:2             | -                        |
| 16 <sup>[d]</sup> | -                                                   | V <sub>EtOH</sub> :V <sub>H<sub>2</sub>O</sub> =3:2             | -                        |
| 17 <sup>[e]</sup> | K <sub>3</sub> PO <sub>4</sub> ·3H <sub>2</sub> O   | V <sub>EtOH</sub> :V <sub>H<sub>2</sub>O</sub> =3:2             | 0.1                      |

[a] Reactions were carried out under blue light irradiation in mixed solvent at room temperature for 3 h with the reaction components in the following ratio: bromobenzene (mol)/phenylboronic acid (mol)/base (mol)/Pd (mol) = 1.0:1.5:3.0:0.00003. [b] Isolated yield of product. [c] P6 as catalyst (i.e., without Pd). [d] No K<sub>3</sub>PO<sub>4</sub>·3H<sub>2</sub>O was used. [e] In darkness.

**Table S4.** Activity contrast of Suzuki reactions over the prepared Pd catalysts. <sup>[a]</sup>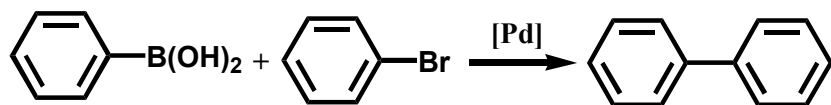

| Entry | Catalysts | Pd Content | Yield (%) <sup>[b]</sup> | TOF (h <sup>-1</sup> ) |
|-------|-----------|------------|--------------------------|------------------------|
| 1     | Pd/P1     | 0.34%      | 97.3                     | 1015                   |
| 2     | Pd/P2     | 0.85%      | 97.2                     | 406                    |
| 3     | Pd/P3     | 0.23%      | 86.6                     | 1336                   |
| 4     | Pd/P4     | 0.20%      | 90.4                     | 1603                   |
| 5     | Pd/P5     | 0.16%      | 90.3                     | 2002                   |
| 6     | Pd/P6     | 0.16%      | 99.2                     | 2198                   |
| 7     | Pd/P7     | 0.19%      | 93.7                     | 1749                   |
| 8     | Pd/P8     | 1.20%      | 95.9                     | 284                    |

[a] Reactions were carried out under blue light irradiation in methanol/H<sub>2</sub>O mixed solvent at room temperature for 3 h with the reaction components in the following ratio: bromobenzene (mol)/phenylboronic acid (mol)/K<sub>3</sub>PO<sub>4</sub>·3H<sub>2</sub>O (mol) /Pd (mol) =1.0:1.5:3.0: **0.00003**. [b] Isolated yield of product.

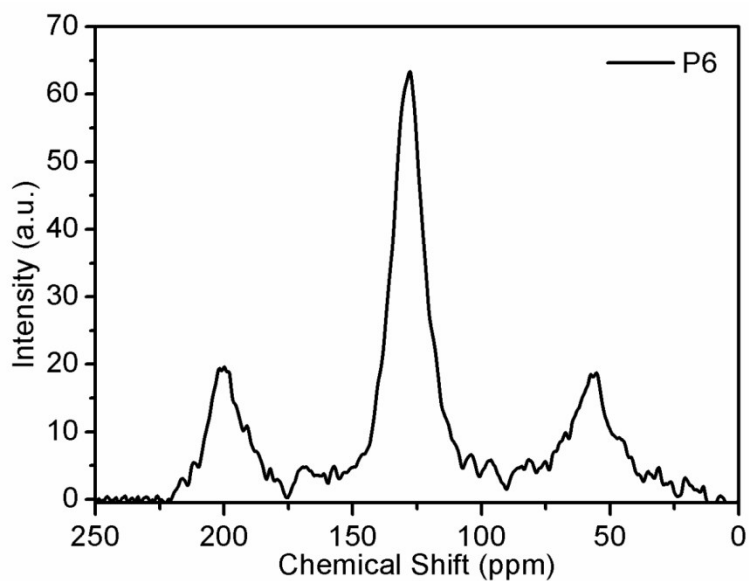

**Figure S1.**  $^{13}\text{C}$  MAS NMR spectrum of polymer P6 in solid state

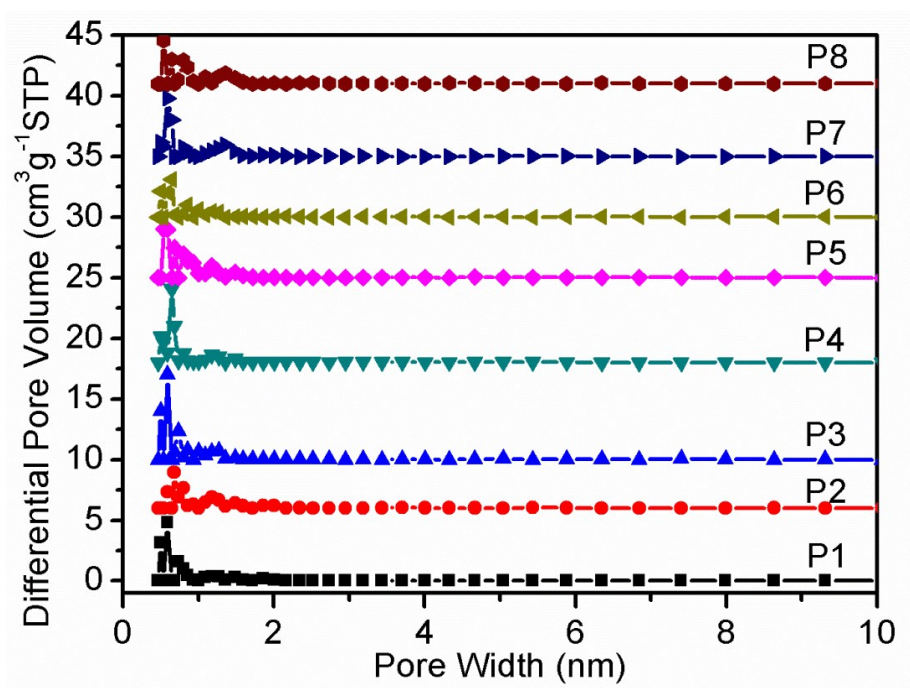

**Figure S2.** Pore width of the prepared pyridine-based POFs materials

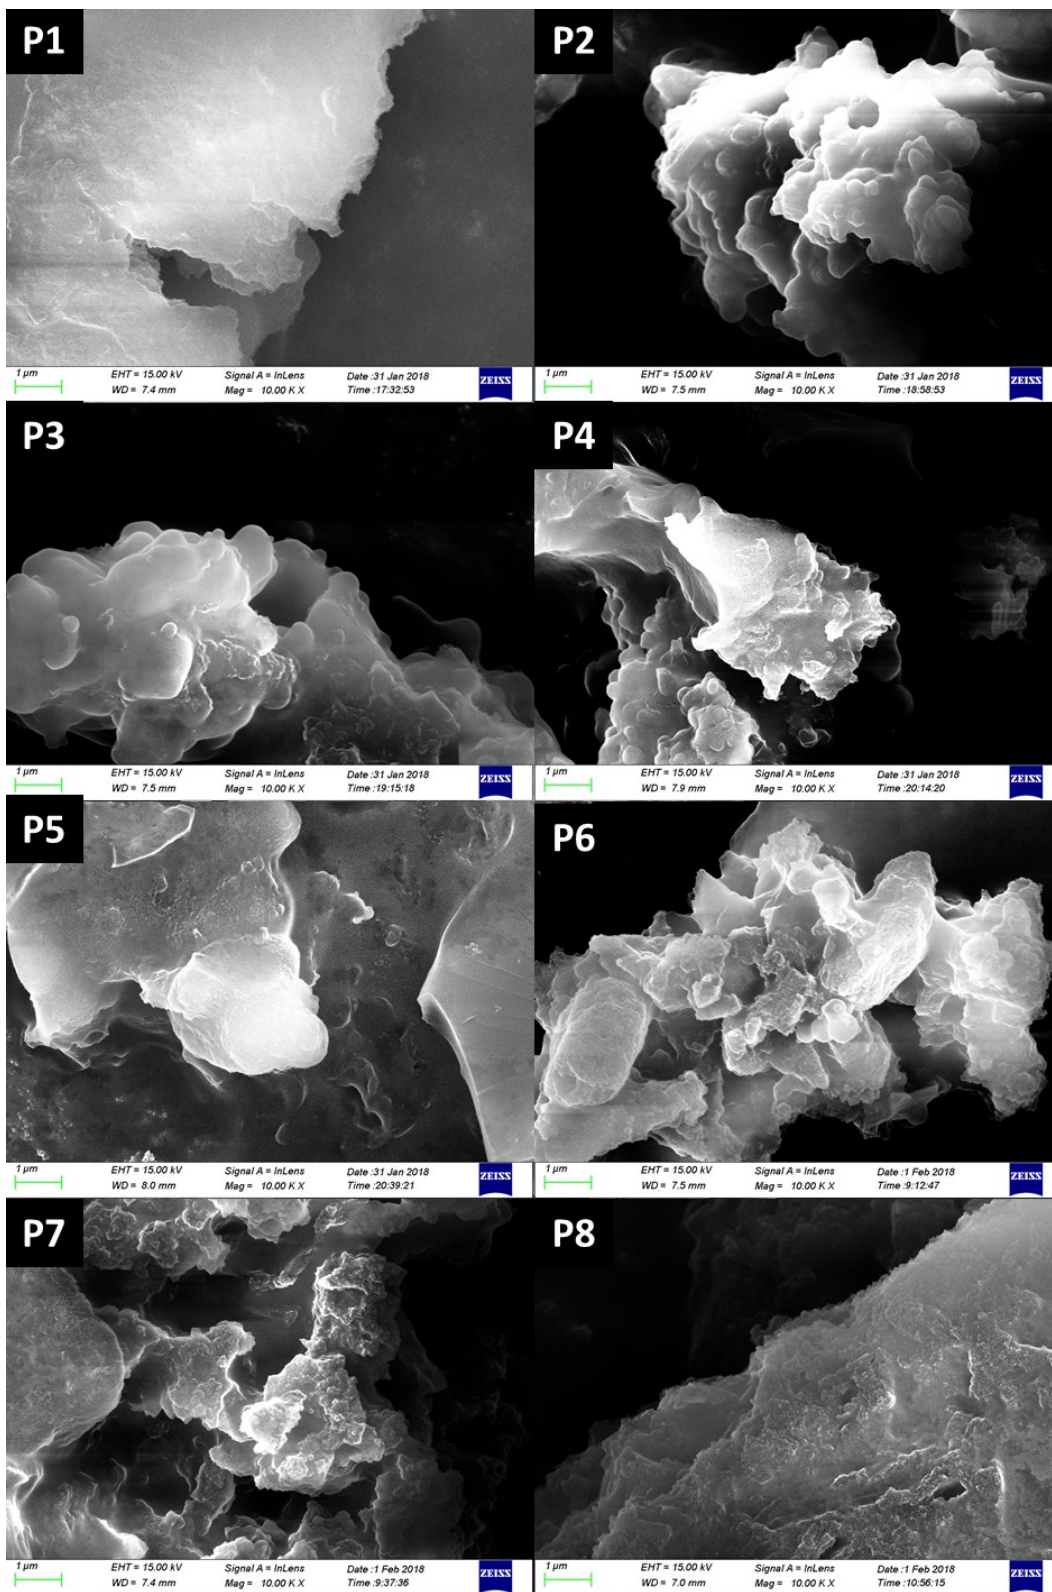

**Figure S3.** SEM images of the prepared pyridine-based POFs materials

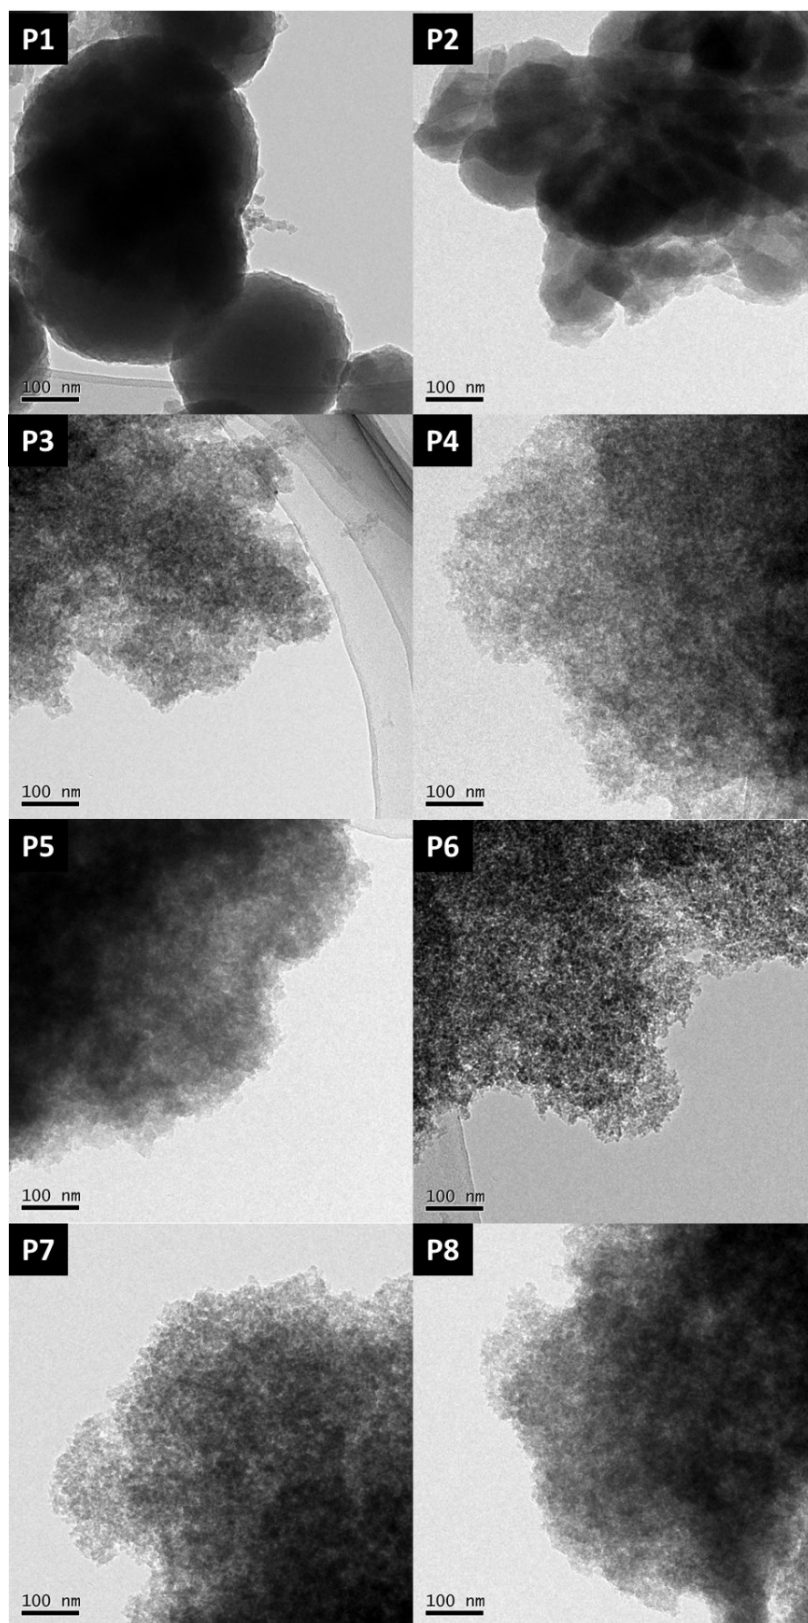

**Figure S4.** TEM images of the prepared pyridine-based POFs materials

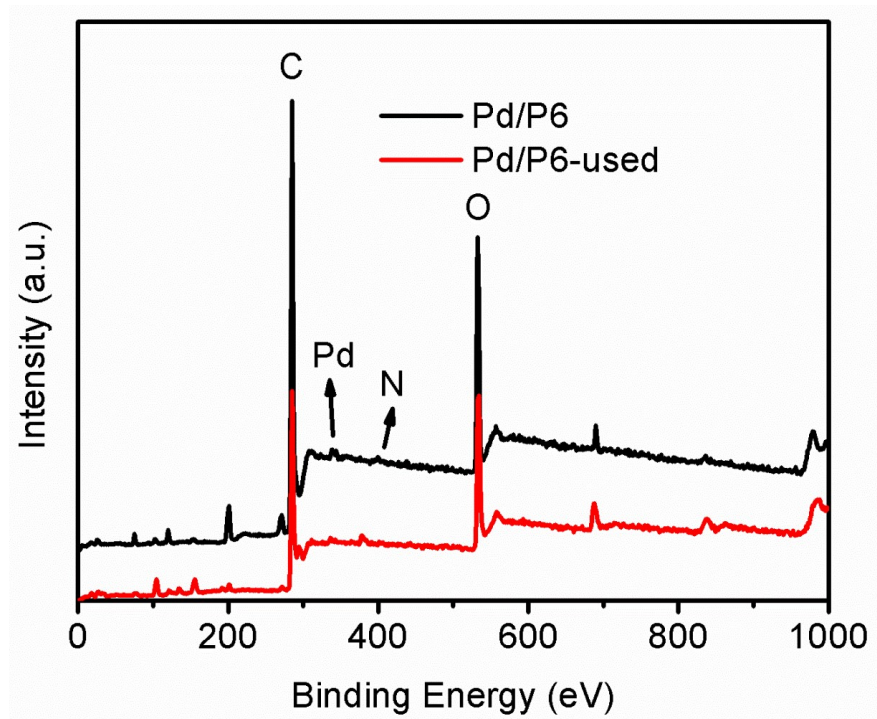

**Figure S5.** XPS full scan spectra of fresh and used Pd/P6 catalyst

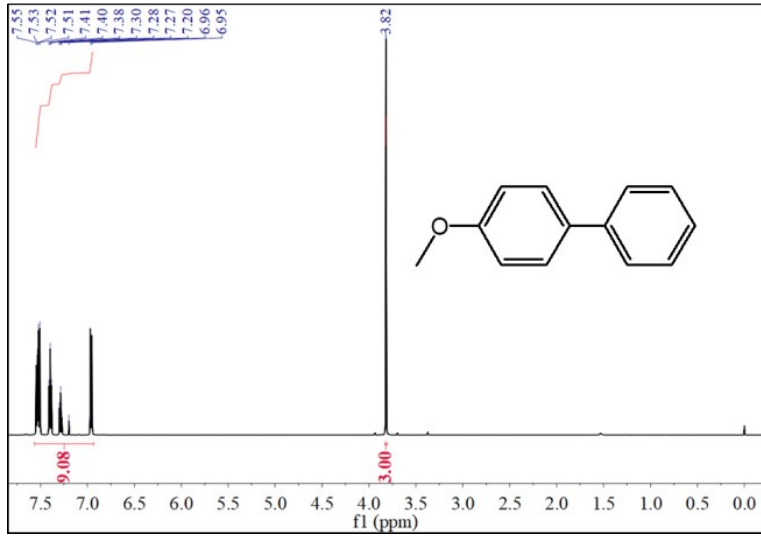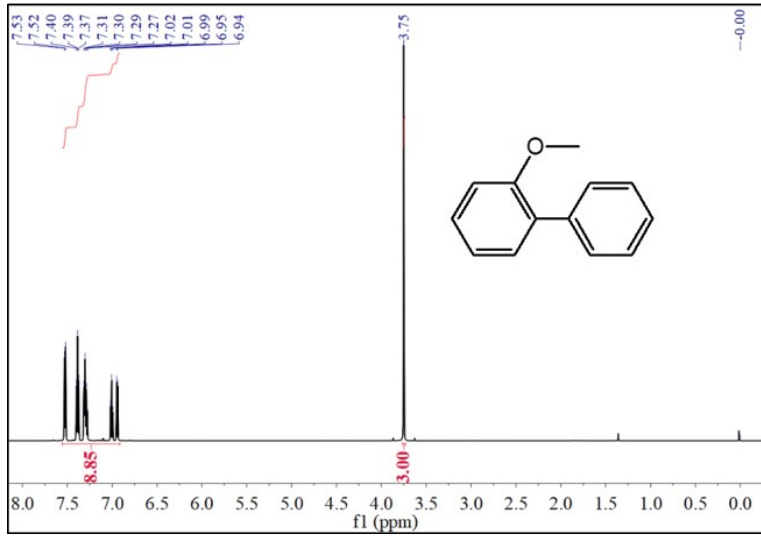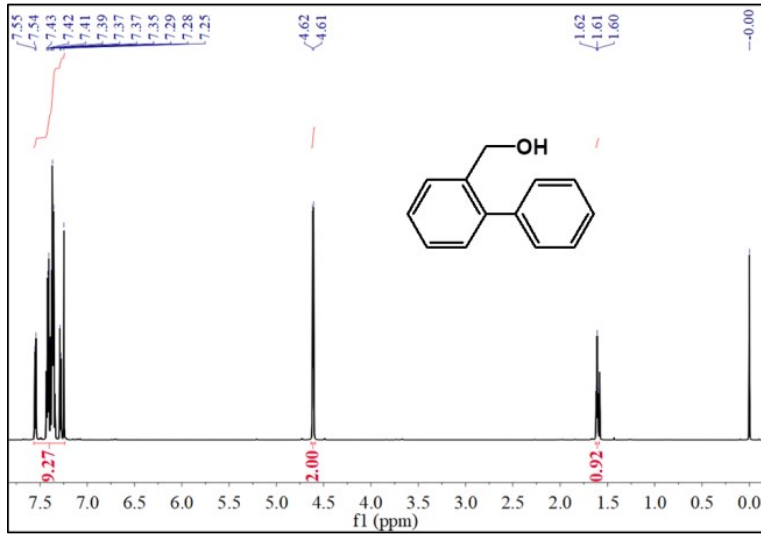



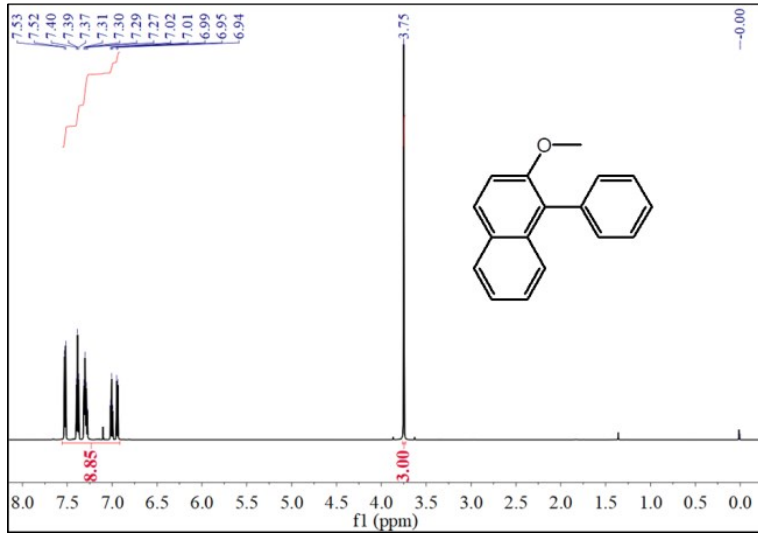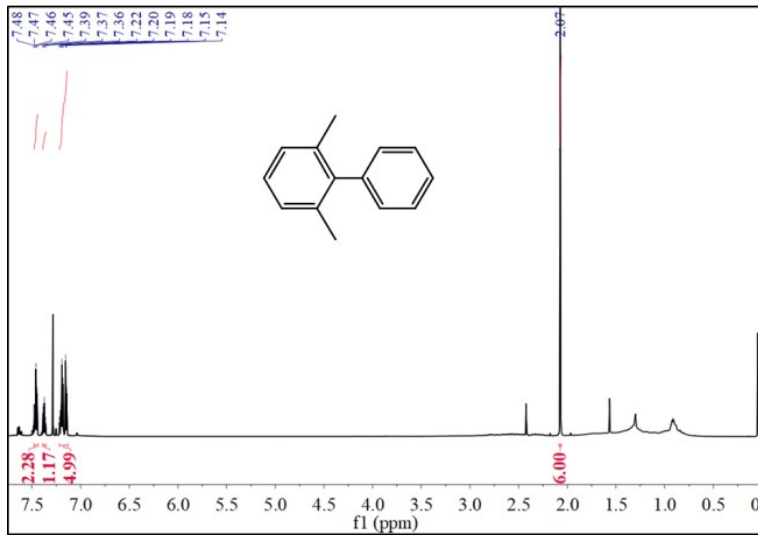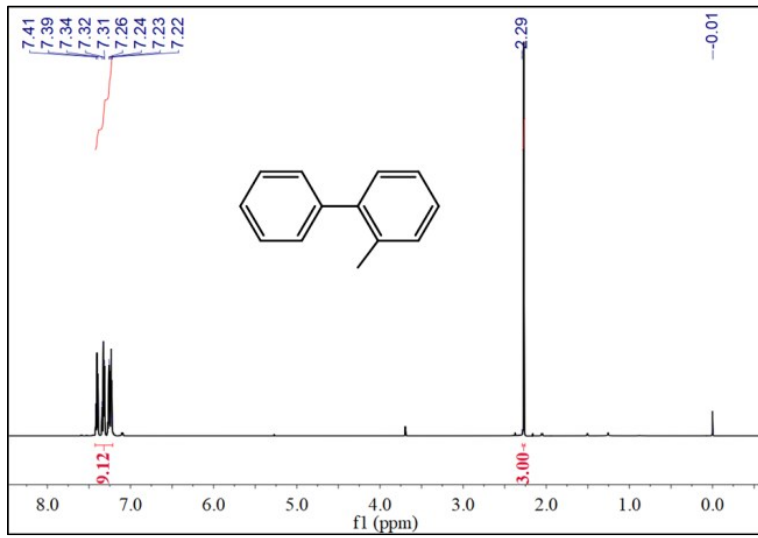

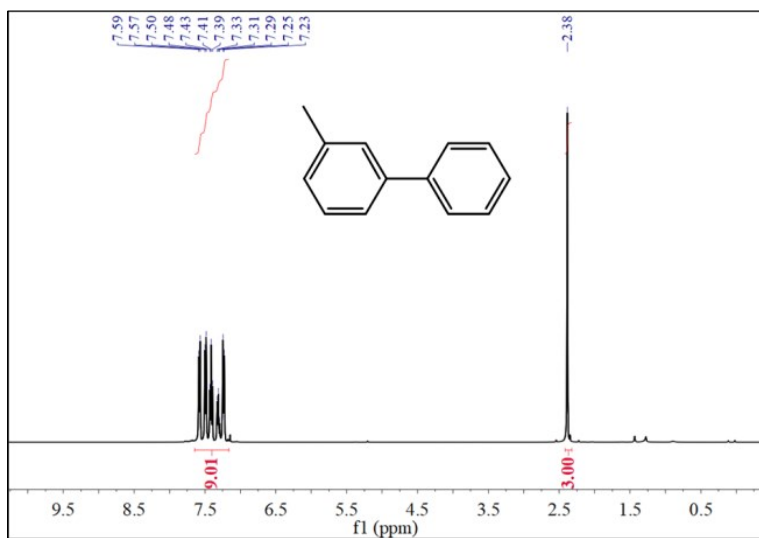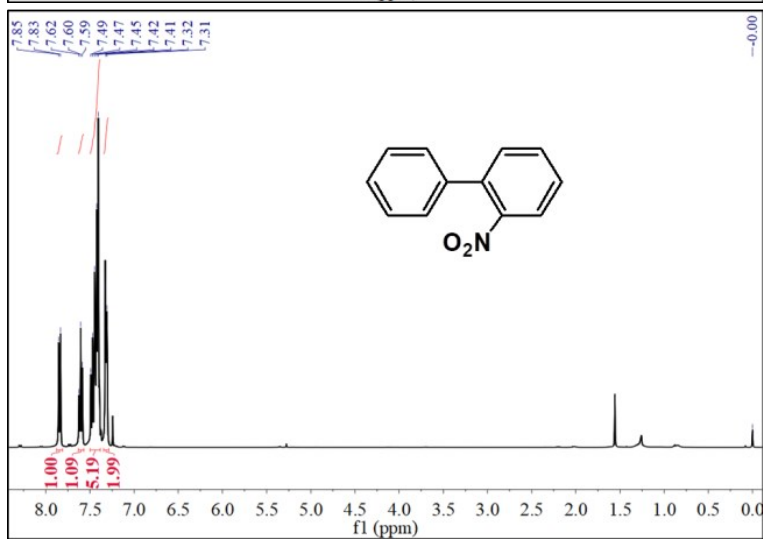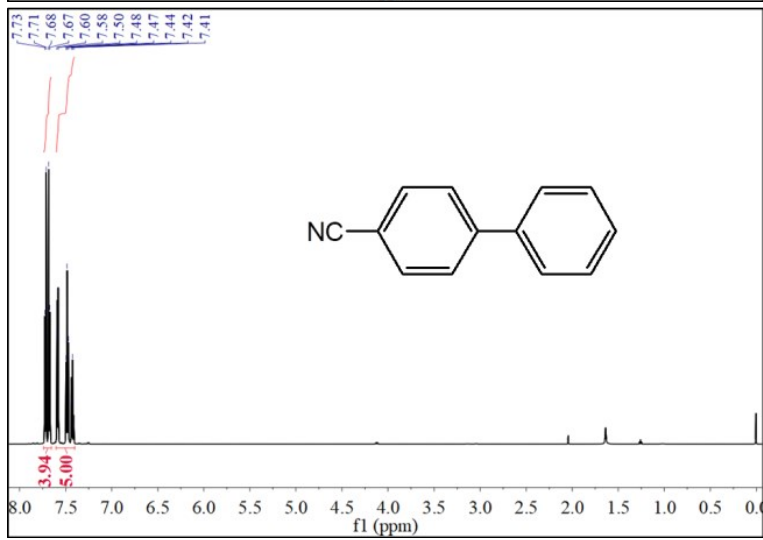

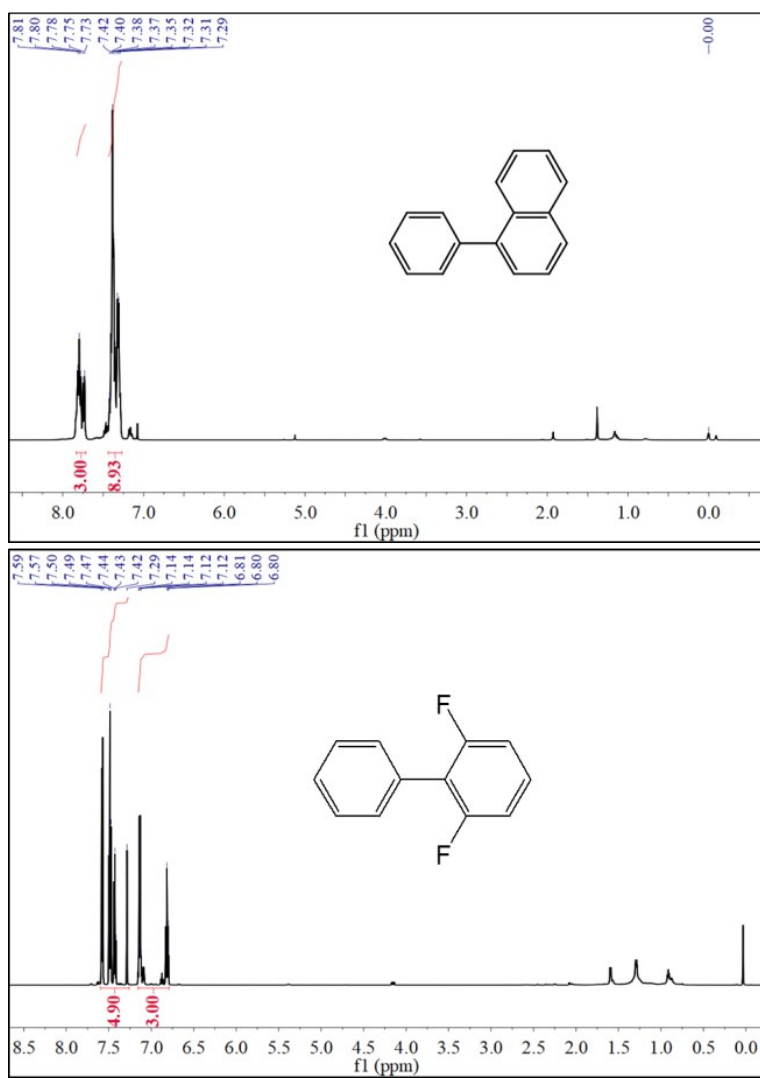

**Figure S5.** <sup>1</sup>H-NMR spectra of products for S-M coupling reaction.
